# Supplementary material for: Effects of ovalbumin protein nanoparticle vaccine size and coating on dendritic cell processing
Source: Royal Society of Chemistry journal article supplement (doi:10.1039/c6bm00500d), 2016-12-05
Supplement: c6bm00500d1.pdf [file c6bm00500d1.pdf]

## Supplemental Information

Table S1. PNP Synthesis Details

| Step                                                       | Small                                             | Medium                                             | Large                                              |
|------------------------------------------------------------|---------------------------------------------------|----------------------------------------------------|----------------------------------------------------|
| Ethanol addition                                           | 1 mL/min                                          | 1 mL/min                                           | 7 mL/min                                           |
| Centrifugation                                             | 7000 g for 5 mins followed by resuspension in PBS | none                                               | none                                               |
| Crosslinking                                               | Aqueous, 0.82 mM DTSSP, stirring for 1 hour       | In 80% ethanol, 0.82 mM DTSSP, stirring for 1 hour | In 80% ethanol, 0.82 mM DTSSP, stirring for 1 hour |
| Centrifugation                                             | 18,000 g for 32 mins                              | 7000 g for 5 minutes                               | 7000 g for 5 minutes                               |
| Resuspension                                               | Sonication in 1 mL PBS or coat solution           | Sonication in 1 mL PBS or coat solution            | Sonication in 1 mL PBS or coat solution            |
| Coating                                                    | Two hours at 4°C                                  | Two hours at 4°C                                   | Two hours at 4°C                                   |
| Second Centrifugation                                      | 18,000 g for 32 mins                              | 18,000 g for 32 mins                               | 7,600 g for 5 mins                                 |
| Second Crosslinking                                        | Aqueous 6.2 mM, stirring for 2 hours              | Aqueous 6.2 mM, stirring for 2 hours               | Aqueous 6.2 mM, stirring for 2 hours               |
| Quenching                                                  | 50 mM Tris base, stirring 15 mins.                | 50 mM Tris base, stirring 15 mins.                 | 50 mM Tris base, stirring 15 mins.                 |
| Third Centrifugation after coating and second crosslinking | 18,000 g for 32 mins                              | 18,000 g for 32 mins                               | 7,600 g for 5 mins                                 |
| Resuspension                                               | Sonication in 0.5 mL PBS                          | Sonication in 0.5 mL PBS                           | Sonication in 0.5 mL PBS                           |

Table S1. Protocol details for creating OVA PNPs of different sizes. Coat solution was 6.2 mg/mL OVA in PBS.

**Table S2. PNP Physical Characterization**

| <b>Particle Type</b> | <b>Average Diameter</b> | <b>Average Pdl</b> | <b>Zeta Potential (mV)</b> | <b>Yield (%)</b> |
|----------------------|-------------------------|--------------------|----------------------------|------------------|
| Small                | 277 nm                  | 0.113              | -21.7 ± 3.0                | 79.7 ± 6.0       |
| Small Coated         | 271 nm                  | 0.094              | -21.5 ± 3.5                | 93.5 ± 7.5       |
| Medium               | 365 nm                  | 0.116              | -21.8 ± 3.5                | 90.1 ± 3.7       |
| Medium Coated        | 357 nm                  | 0.135              | -20.5 ± 3.0                | 99.4 ± 21        |
| Large                | 567 nm                  | 0.055              | -22.1 ± 2.7                | 81.5 ± 3.8       |
| Large Coated         | 559 nm                  | 0.050              | -21.4 ± 2.0                | 100.3 ± 11       |

Table S2. Size, polydispersity, zeta potential, and yield of PNPs of different sizes and coatings. Yield was defined as final mass over initial desolvated mass. Since extra mass was adsorbed through the coating step, yield for those particles was higher, and it was possible to exceed 100% yield.

Figure S1. Soluble and PNP Ratiometric Fluorescent Standard Curves

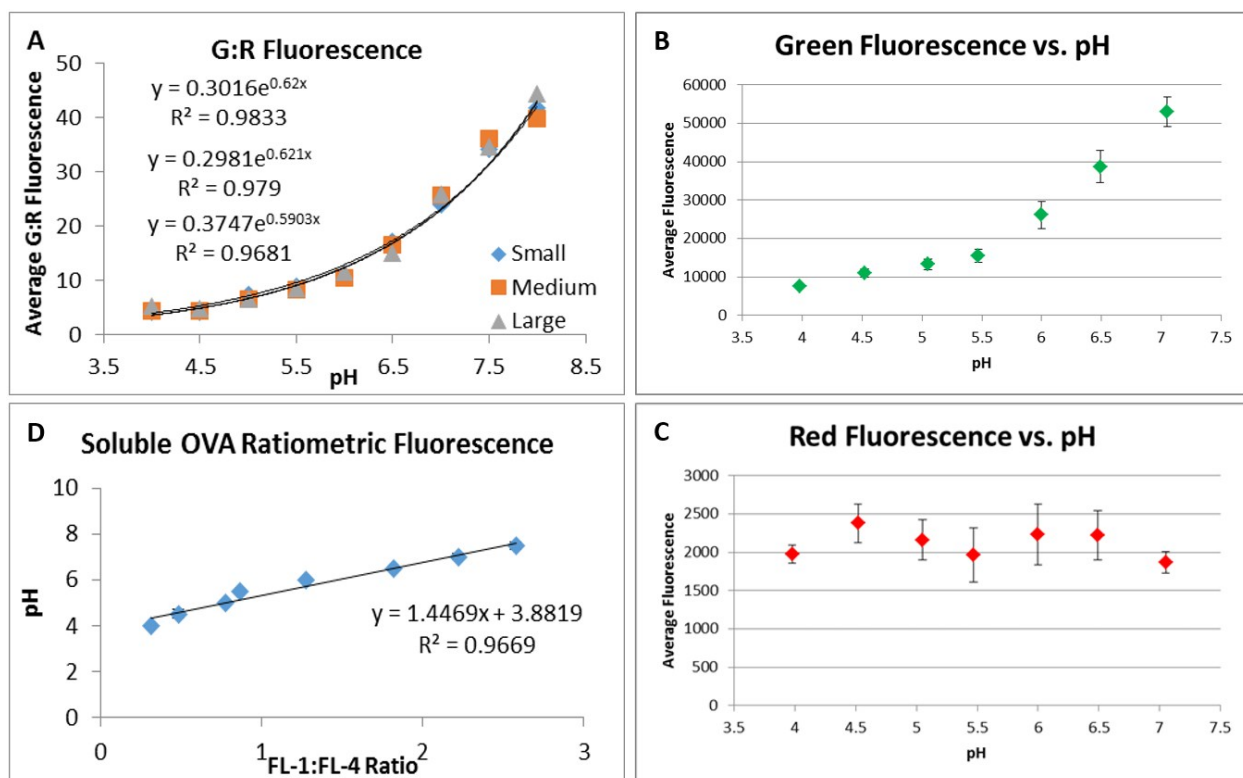

Fig S1. Standard curves of ratiometric fluorescence vs. pH were made from DCs incubated with PNPs and buffered to various pHs (A). Green fluorescence decreases with pH (B) while red fluorescence does not (C). Standard curve for soluble OVA was measured in DCs by flow cytometry (D).

Figure S2. Fluorescent and Non-Fluorescent PNP size

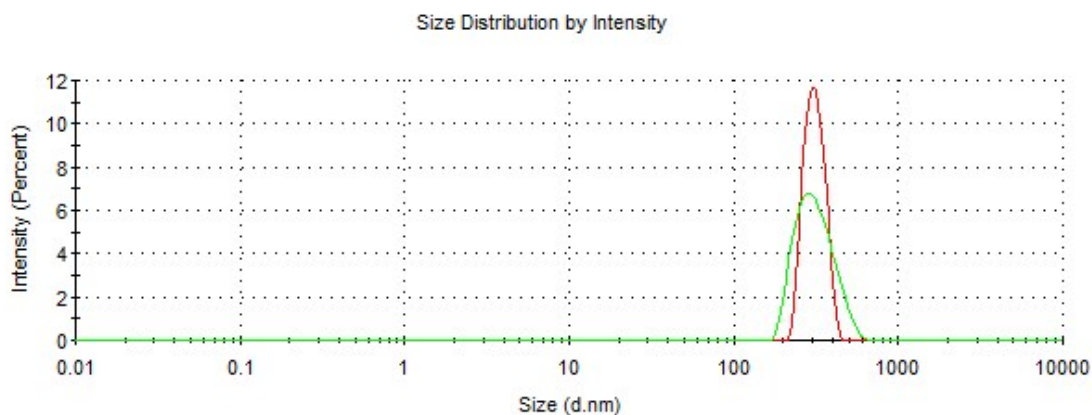

Fig S2. Representative size distributions of medium non-fluorescent (red) and fluorescent (green) PNPs.

**Figure S3. Confocal Uptake Images**

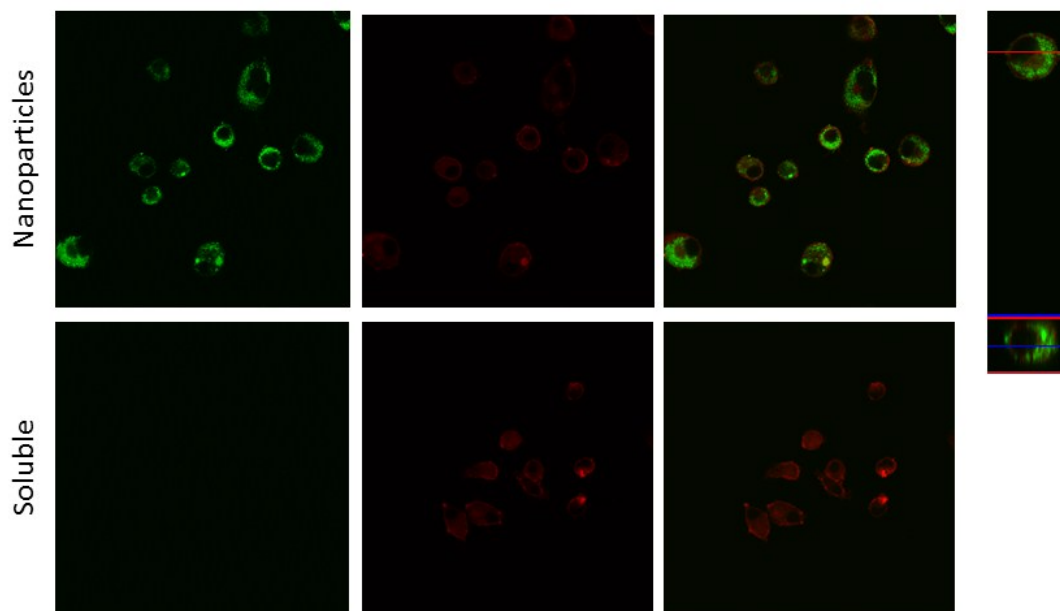

Figure S3. Jaws II Dendritic cells were incubated with 100  $\mu\text{g}/\text{mL}$  small, uncoated, green-fluorescent PNPs for 6 hours. Cells were then washed with PBS, permeablized with 1% Triton-X in PBS, and washed twice more. Rhodamine-phalloidin (1:40) was used to stain the actin cytoskeleton, and incubated with the cells for 15 minutes at room temperature. After 3 more PBS washes, the cells were imaged using a Zeiss confocal laser-scanning microscope.

Green-fluorescent PNPs were found to be enclosed by the actin cytoskeleton in all z-stacks (right), indicating uptake rather than adsorption of PNPs. Uptake of soluble protein was barely detectable.

**Figure S4. Volume to Circumference Calculations**

$$\frac{\text{Volume}}{\text{Circumference}} \propto r^2$$

$$\frac{V_{PNP}}{C_{PNP}} = \frac{r_{PNP}^2}{r_{sol}^2}$$

$$\frac{150 \text{ nm}^2}{5 \text{ nm}^2} = 900$$

Volume to circumference ratios of PNPs are much greater than those of soluble proteins, suggesting PNPs deliver more antigen to DCs than soluble protein does for a given amount of actin polymerization. This would explain why PNP internalization is not as strongly inhibited by cytochalasin D as soluble OVA is.

Graphical abstract OVA image adapted from PDB ID 1OVA: Stein PE, Leslie AG, Finch JT, Carrell RW. "Crystal structure of uncleaved ovalbumin at 1.95Å resolution." *J Mol Biol.* 1991 Oct 5;221(3):941-59.

**Figure S5. Coating PNPs with BSA**

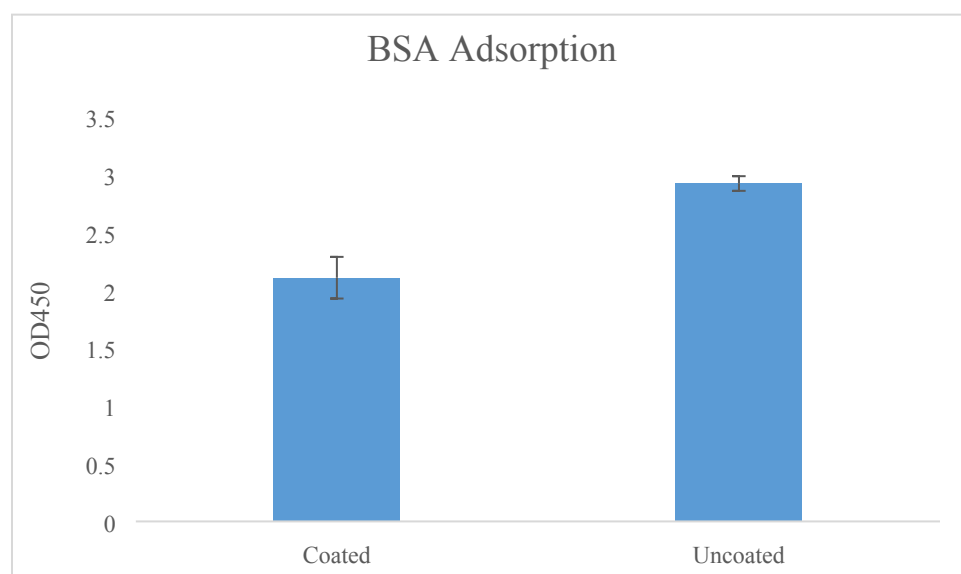

Figure S5. Small coated and uncoated OVA PNPs were incubated in 10 mg/mL bovine serum albumin (BSA) for 2 hours, collected by centrifugation, and crosslinked as described in Table S1. Nanoparticles were then assessed for BSA presence via ELISA. Uncoated OVA PNPs adsorbed significantly more BSA than OVA-coated OVA PNPs did ( $p = 0.02$ ,  $n = 2$  per group).

Figure S6. MHC I and MHC II Upregulation

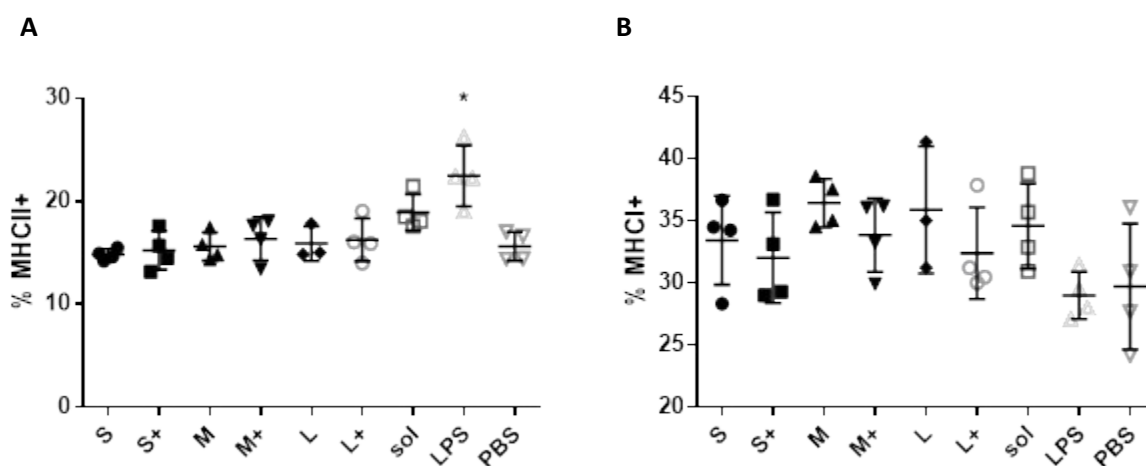

Figure S6. C57BL/6 bone marrow was cultured and matured into BMDCs as described in Section 2.8, and seeded at a density of  $3 \times 10^5$  cells/mL in 96-well plates. After 24 hours of stimulation with OVA PNPs, soluble OVA (sol), or soluble OVA + 1  $\mu$ g/mL LPS (LPS), cells were blocked with anti-CD16/32, and incubated with APC-conjugated anti-H-2K<sup>b</sup>-SIINFEKL (MHC I) and FITC-conjugated anti-I-A<sup>b</sup> (MHC II) according to the manufacturer's instructions (Biolegend). Upregulation was assessed by flow cytometry, and the percentage of cells expressing high levels of MHC II (A) or MHC I-SIINFEKL (B) are displayed.

LPS-treated BMDCs expressed significantly higher levels of MHC II than OVA PNP types and PBS (left). No significant differences between PNPs, soluble OVA, and PBS were observed. Our observations of humoral responses generated to PNPs in previous *in vivo* studies appears contradictory to the lack of MHC II presentation observed here, although the display of MHC II on LPS-stimulated BMDCs could suggest that different timescales of MHC II presentation are relevant for different types of adjuvants. No significant differences in MHC I-SIINFEKL expression were observed across any groups (B). This may be because PNPs and soluble OVA and OVA+LPS controls contained whole OVA antigen, not the SIINFEKL OVA peptide, which is normally used for MHC I-SIINFEKL assessment.
